# Supplementary material for: Ethanol and Acetic Acid Production from Carbon Monoxide in a Clostridium Strain in Batch and Continuous Gas-Fed Bioreactors
Source: Int J Environ Res Public Health. 2015 Jan 20;12(1):1029–43. doi: 10.3390/ijerph120101029 (PMC4306909; doi:10.3390/ijerph120101029)
Supplement: Supplementary File 1 [file ijerph-12-01029-s001.pdf]

## Ethanol and Acetic Acid Production from Carbon Monoxide in a *Clostridium* Strain in Batch and Continuous Gas-Fed Bioreactors

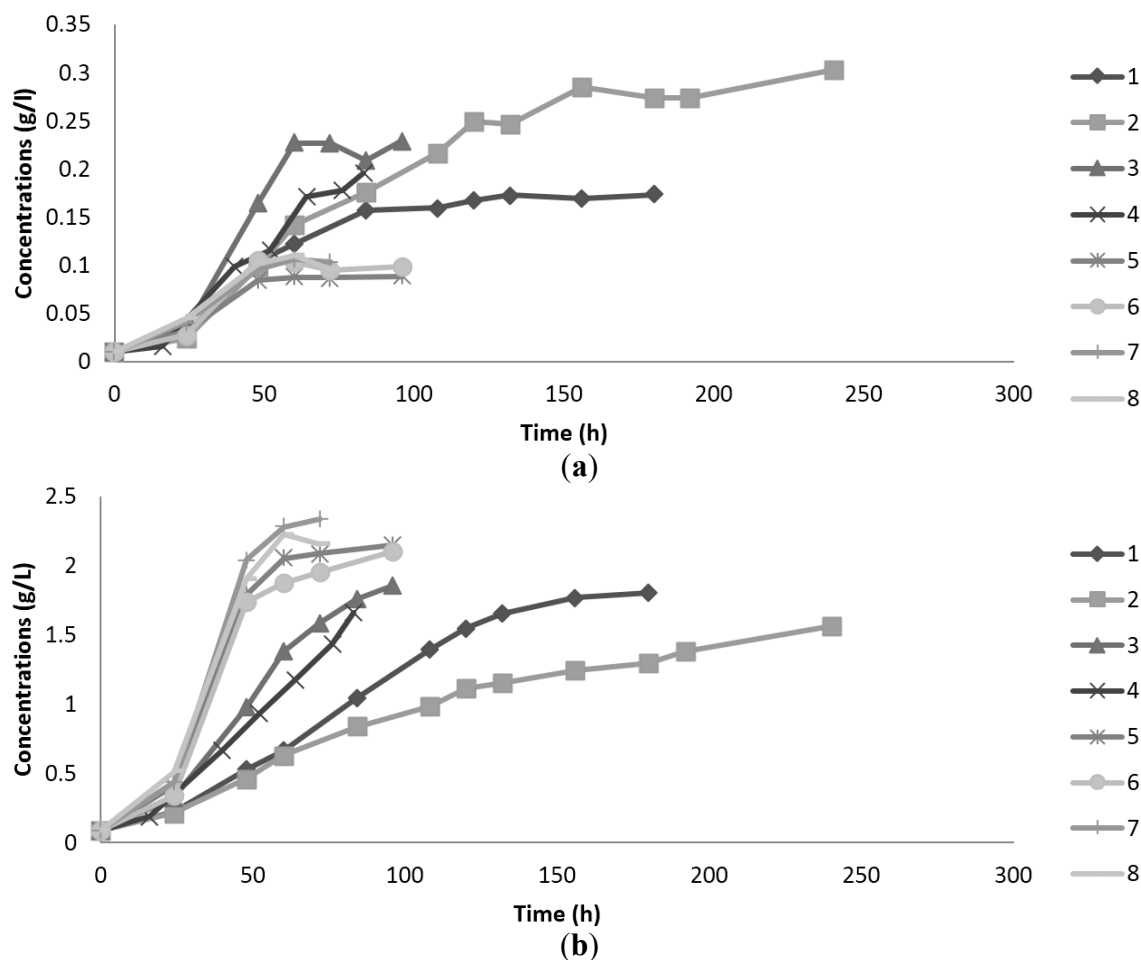

**Figure S1.** Products profile at eight different runs performed in bottle experiments: (a) ethanol profile and (b) acetic acid profile.
